# Supplementary material for: High‐Performance Virus Removal Filter Paper for Drinking Water Purification
Source: PubMed Central journal article supplement (PMC6607295; doi:10.1002/gch2.201800031), 2018-07-11
Supplement: GCH2-2-1800031-s001.pdf [file GCH2-2-1800031-s001.pdf]

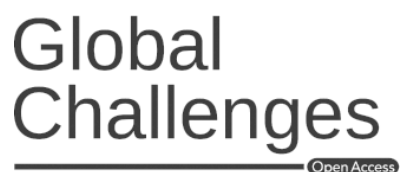

## Supporting Information

for *Global Challenges*, DOI: 10.1002/gch2.201800031

**High-Performance Virus Removal Filter Paper for Drinking  
Water Purification**

*Olof Gustafsson, Levon Manukyan, and Albert Mihranyan\**

## Supporting Information

**High Performance Virus Removal Filter Paper for Drinking Water Purification***Olof Gustafsson, Levon Manukyan, Albert Mihranyan*

CP-DSC. Typical heat flow curves from CP-DSC analysis of the nanocellulose filter papers are presented in Figure S1.

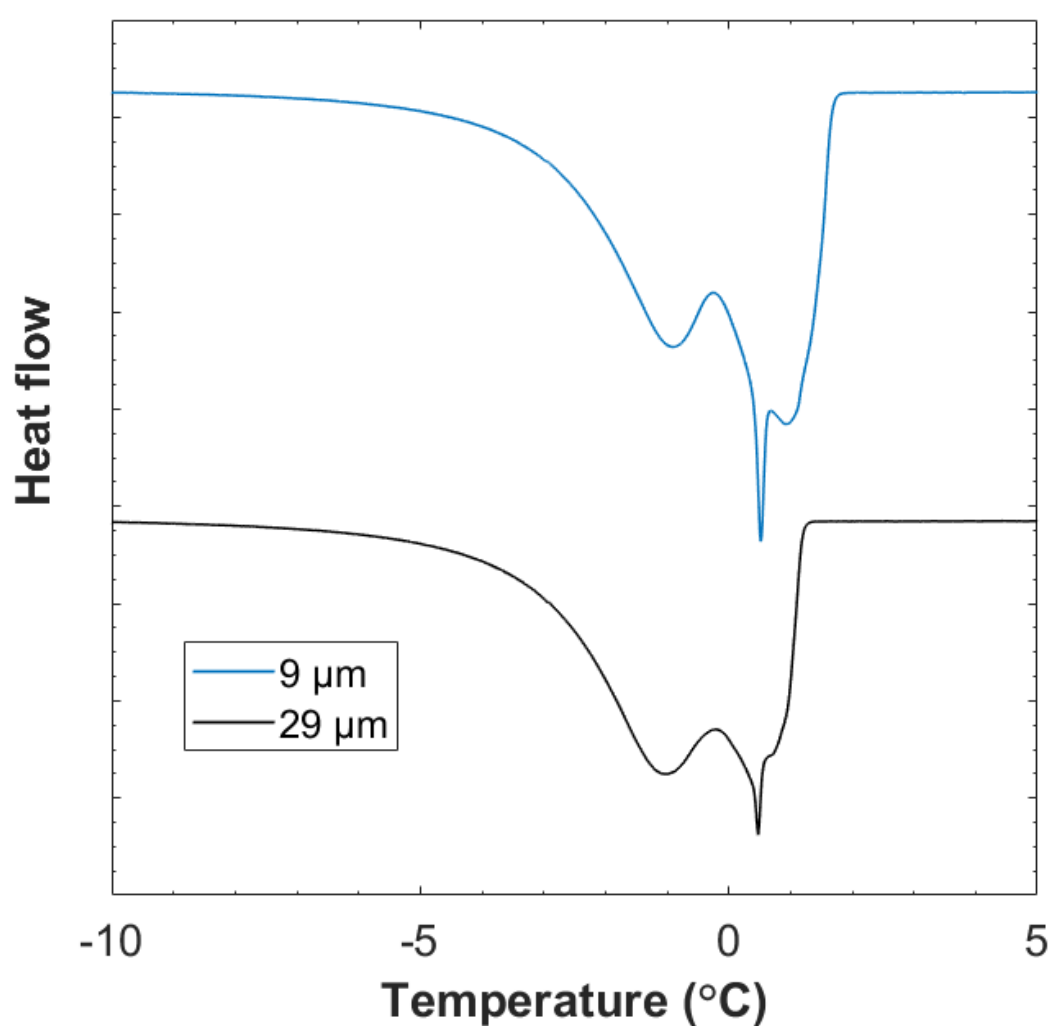

**Figure S1.** Typical heat flow curves as a function of temperature for nanocellulose filter papers of thicknesses 9 μm and 29 μm acquired from DSC with water as liquid and a heating rate of 0.7 K/min.

Two peaks are distinguishable in the figure for both thicknesses; i.e. one peak for melting of bulk water around 0.5 °C and another peak for melting of water confined in pores around -1 °C.

*SWW Filtration.* The  $V_{max}$  analysis is based on the linearized form of the flux decay model, with pore constriction as the fouling mechanism, expressed in Equation S1.

$$\frac{1}{Q} = \frac{1}{Q_0} + \left(\frac{1}{V_{max}}\right) t \quad (S1)$$

$Q$  is the measured flux over time  $t$ , and  $Q_0$  is the initial flux.  $V_{max}$  is the maximum throughput volume before complete clogging of the filter structure occurs.  $V_{max}$  is given from the slope when  $1/Q$  is plotted against  $t$ , and is a result of extrapolation of the experimental flux data.

In Figure S3 and S4 the resulting  $V_{max}$  analysis of the flux data presented in Figure 5 and 6 is shown. For negative slopes,  $V_{max}$  was reported as not available (N/A), due to a resulting negative value for  $V_{max}$ .

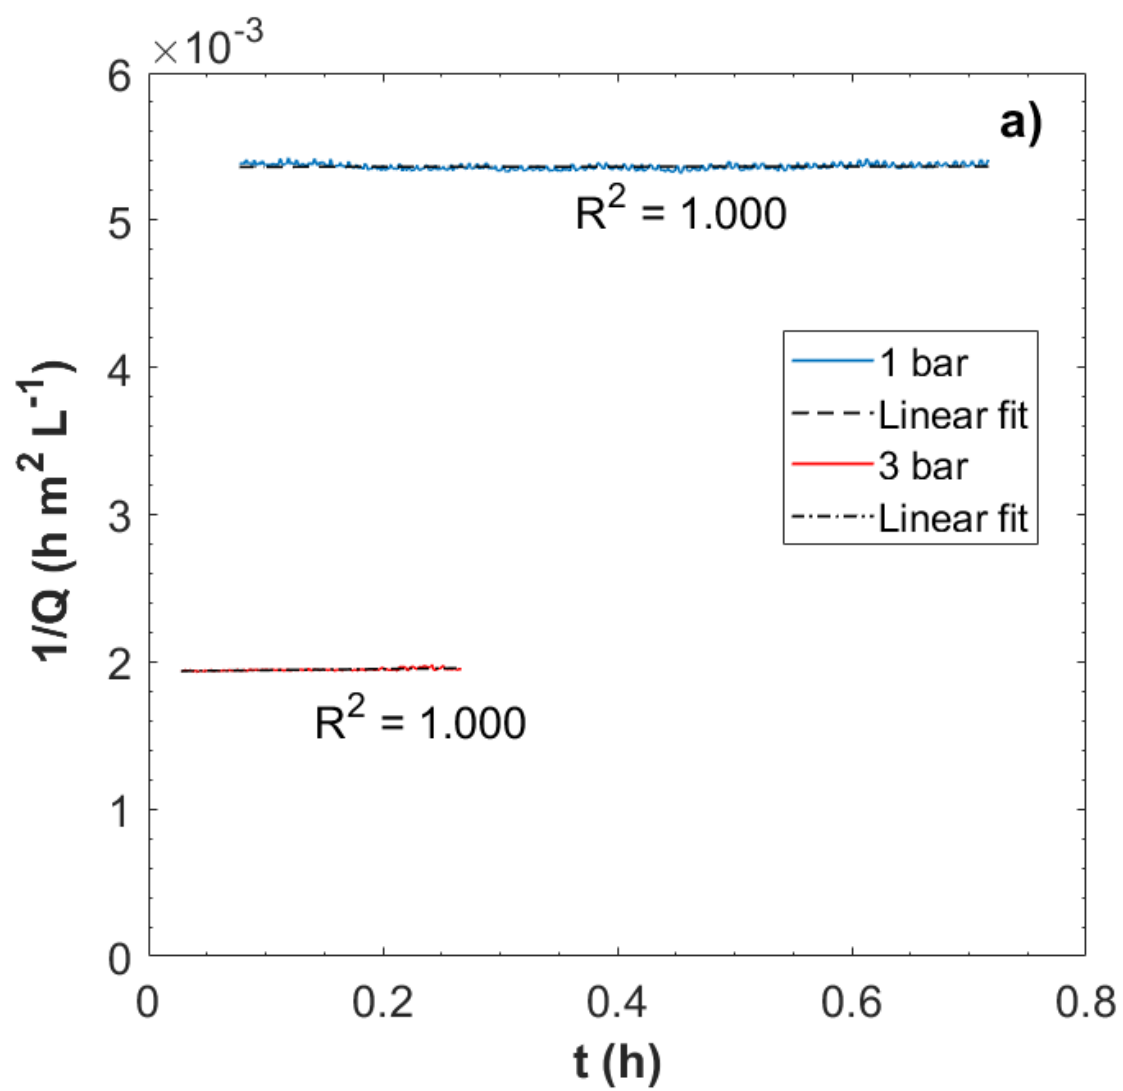

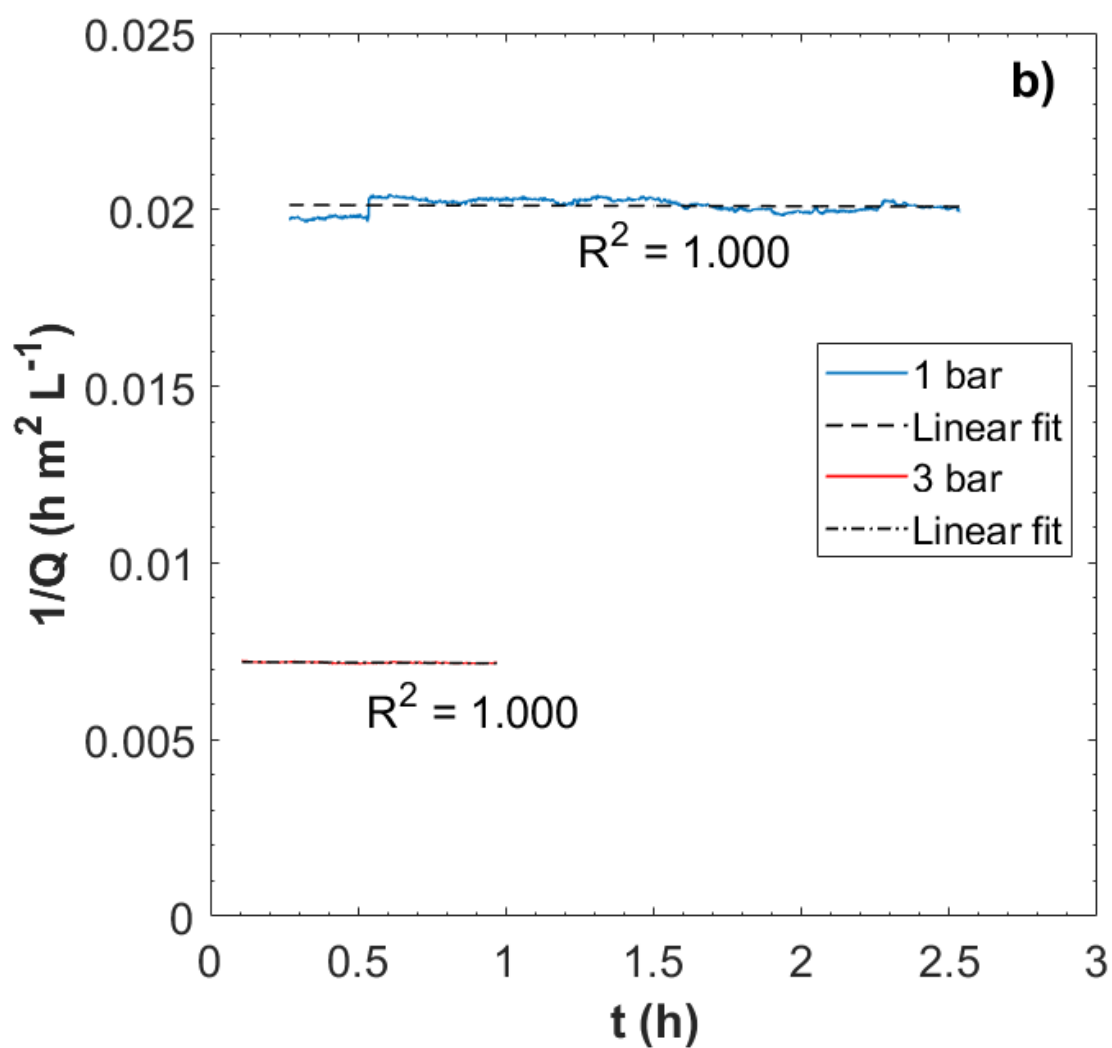

**Figure S2.** Typical curves from  $V_{max}$  analysis for filtration of SWW through nanocellulose filter papers of thicknesses a)  $9 \mu\text{m}$  and b)  $29 \mu\text{m}$ . Solid curves indicate observed values of the inverted flux at overhead pressures 1 bar and 3 bar. The dashed curves are linear regression fits for analysis of  $V_{max}$  according to Equation S1. The TSS content in the SWW was  $0.251 \text{ mg/L}$ .

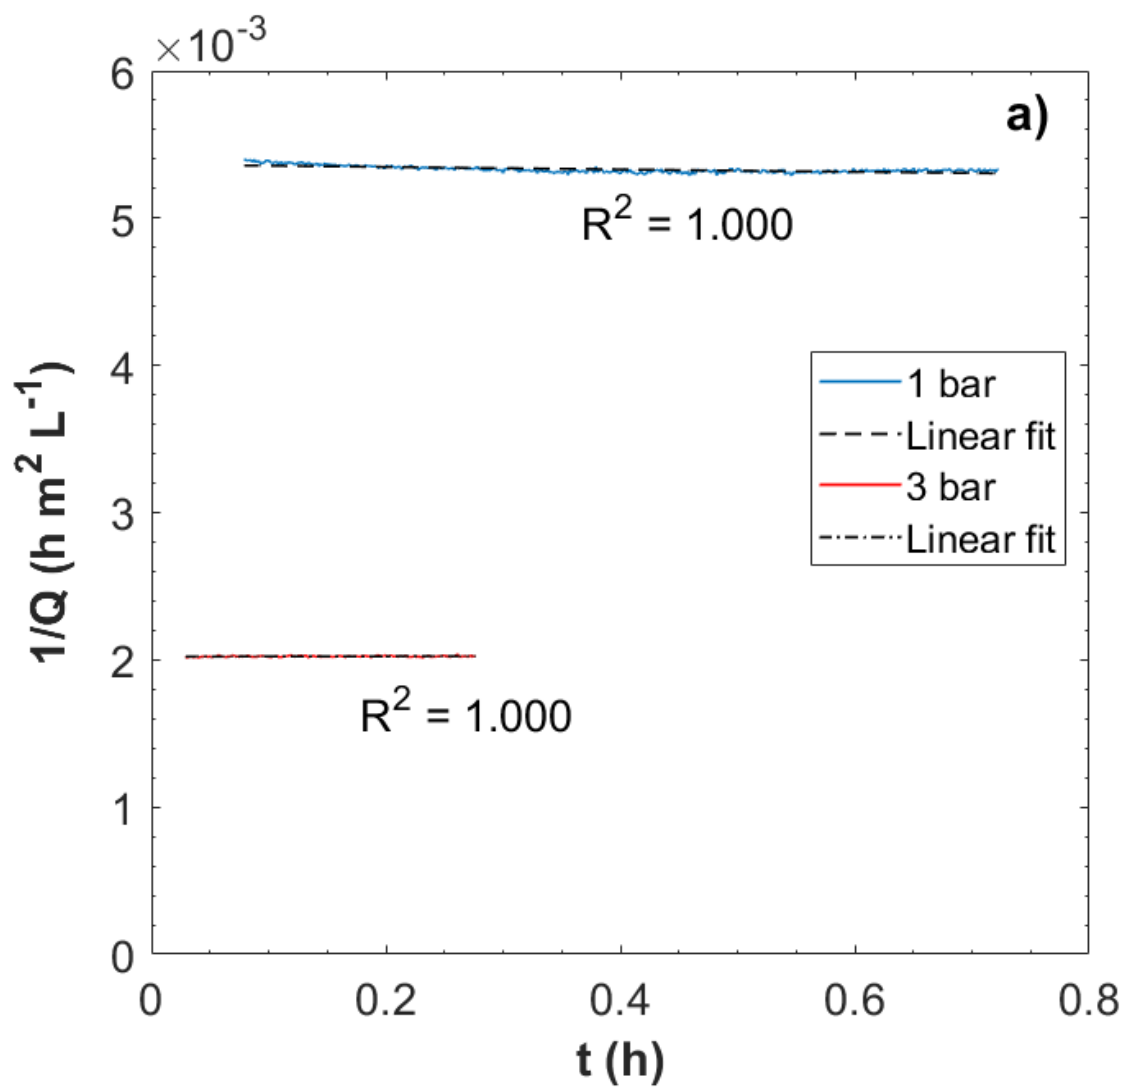

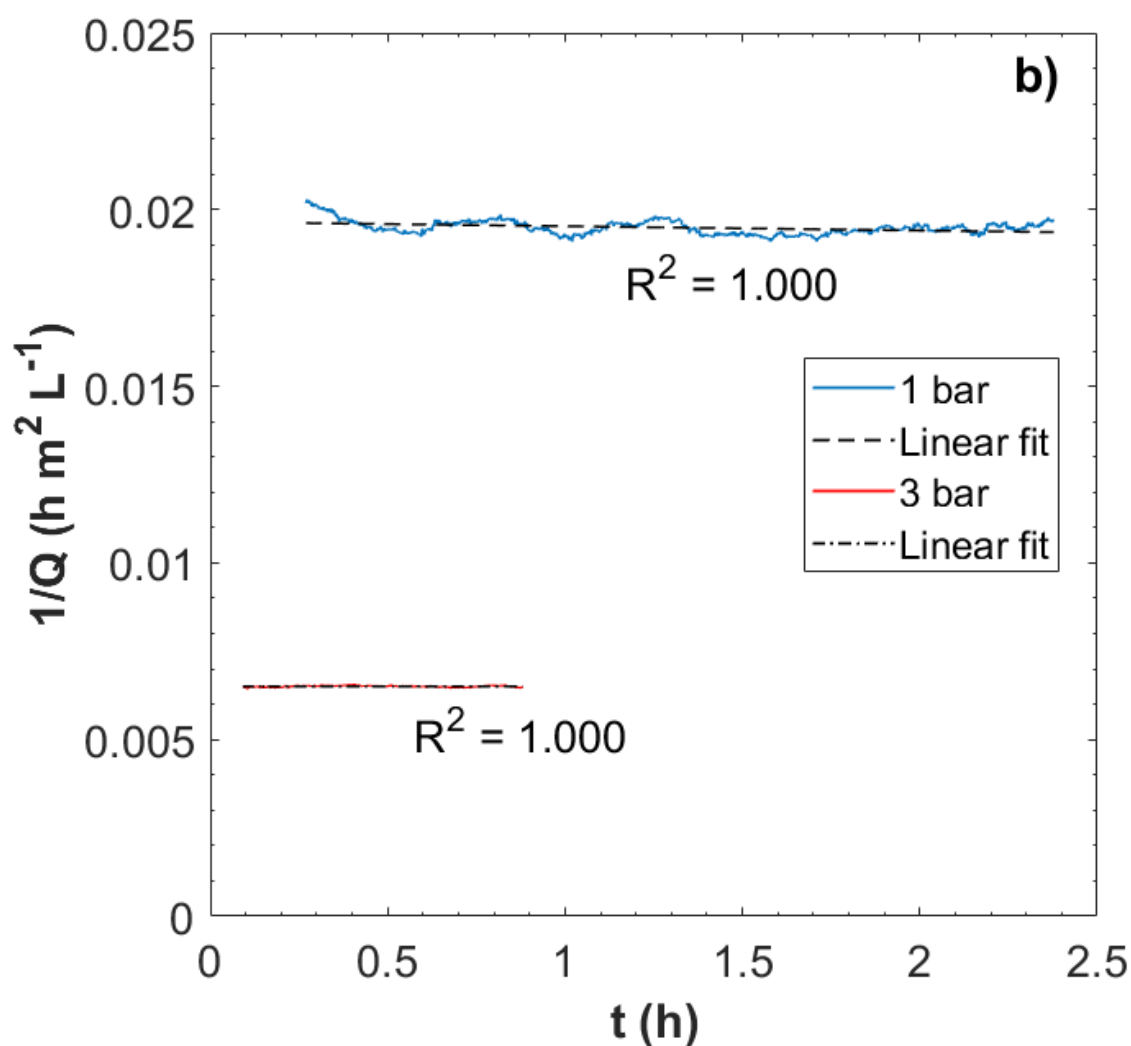

**Figure S3.** Typical curves from  $V_{max}$  analysis for filtration of SWW through nanocellulose filter papers of thicknesses a) 9  $\mu\text{m}$  and b) 29  $\mu\text{m}$ . Solid curves indicate observed values of the inverted flux at overhead pressures 1 bar and 3 bar. The dashed curves are linear regression fits for analysis of  $V_{max}$  according to Equation S1. The TSS content in the SWW was 2.51 mg/L.

**Table S1.** Results from  $V_{max}$  analysis for filtration of SWW through nanocellulose filter papers. The TSS content in the SWW was 0.251 mg/L.

| Filter paper thickness [ $\mu\text{m}$ ] | Filtration overhead pressure [bar] | Slope of linear fit [ $1/V_{max}$ ] | $V_{max}$ [ $\text{L m}^{-2}$ ] |
|------------------------------------------|------------------------------------|-------------------------------------|---------------------------------|
| 9                                        | 1                                  | $1.0 \cdot 10^{-4}$                 | $1.0 \cdot 10^4$                |
|                                          | 1                                  | $4.7 \cdot 10^{-6}$                 | $2.1 \cdot 10^5$                |
|                                          | 1                                  | $-2.7 \cdot 10^{-6}$                | N/A                             |
| 9                                        | 3                                  | $8.1 \cdot 10^{-5}$                 | $1.2 \cdot 10^4$                |
|                                          | 3                                  | $4.3 \cdot 10^{-5}$                 | $2.3 \cdot 10^4$                |
|                                          | 3                                  | $-7.8 \cdot 10^{-5}$                | N/A                             |

|    |   |                      |                  |
|----|---|----------------------|------------------|
| 29 | 1 | $-1.9 \cdot 10^{-5}$ | N/A              |
|    | 1 | $9.3 \cdot 10^{-5}$  | $1.1 \cdot 10^4$ |
|    | 1 | $-4.7 \cdot 10^{-4}$ | N/A              |
| 29 | 3 | $-7.7 \cdot 10^{-5}$ | N/A              |
|    | 3 | $-2.0 \cdot 10^{-4}$ | N/A              |
|    | 3 | $-4.2 \cdot 10^{-5}$ | N/A              |

**Table S2.** Results from  $V_{max}$  analysis for filtration of SWW through nanocellulose filter papers. The TSS content in the SWW was 2.51 mg/L.

| Filter paper thickness [ $\mu\text{m}$ ] | Filtration overhead pressure [bar] | Slope of linear fit [ $1/V_{max}$ ] | $V_{max}$ [ $\text{L m}^{-2}$ ] |
|------------------------------------------|------------------------------------|-------------------------------------|---------------------------------|
| 9                                        | 1                                  | $-5.0 \cdot 10^{-6}$                | N/A                             |
|                                          | 1                                  | $-8.3 \cdot 10^{-5}$                | N/A                             |
|                                          | 1                                  | $4.4 \cdot 10^{-5}$                 | $2.3 \cdot 10^4$                |
| 9                                        | 3                                  | $-3.5 \cdot 10^{-5}$                | N/A                             |
|                                          | 3                                  | $5.9 \cdot 10^{-5}$                 | $1.7 \cdot 10^4$                |
|                                          | 3                                  | $1.1 \cdot 10^{-5}$                 | $9.3 \cdot 10^4$                |
| 29                                       | 1                                  | $-1.2 \cdot 10^{-4}$                | N/A                             |
|                                          | 1                                  | $-2.9 \cdot 10^{-4}$                | N/A                             |
|                                          | 1                                  | $-4.6 \cdot 10^{-4}$                | N/A                             |
| 29                                       | 3                                  | $1.9 \cdot 10^{-5}$                 | $5.1 \cdot 10^4$                |
|                                          | 3                                  | $2.3 \cdot 10^{-5}$                 | $4.3 \cdot 10^4$                |
|                                          | 3                                  | $-4.0 \cdot 10^{-6}$                | N/A                             |

*Filtration of Latex Nanoparticles in SWW.* Typical curves from the  $V_{max}$  analysis from filtrations of 30 nm latex particles in SWW is presented in Figure S4. The linear fittings showed good correlations to experimental data in the  $V_{max}$  analysis for both filter thicknesses and pressures, as seen from the  $R^2$ -values in Figure S4. This would indicate that pore constriction is the fouling mechanism during filtration of the latex particles in the filter paper.



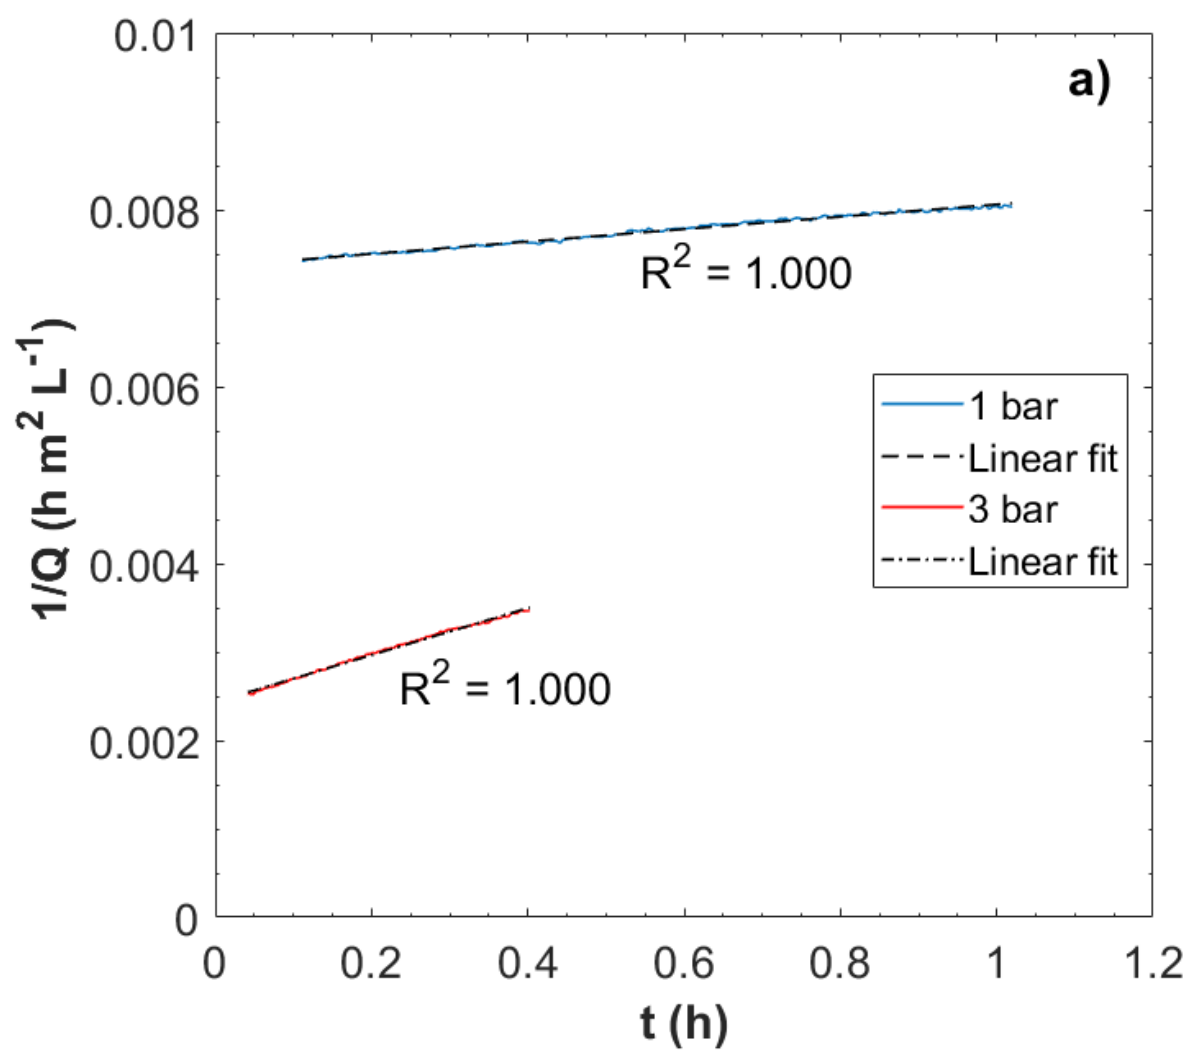

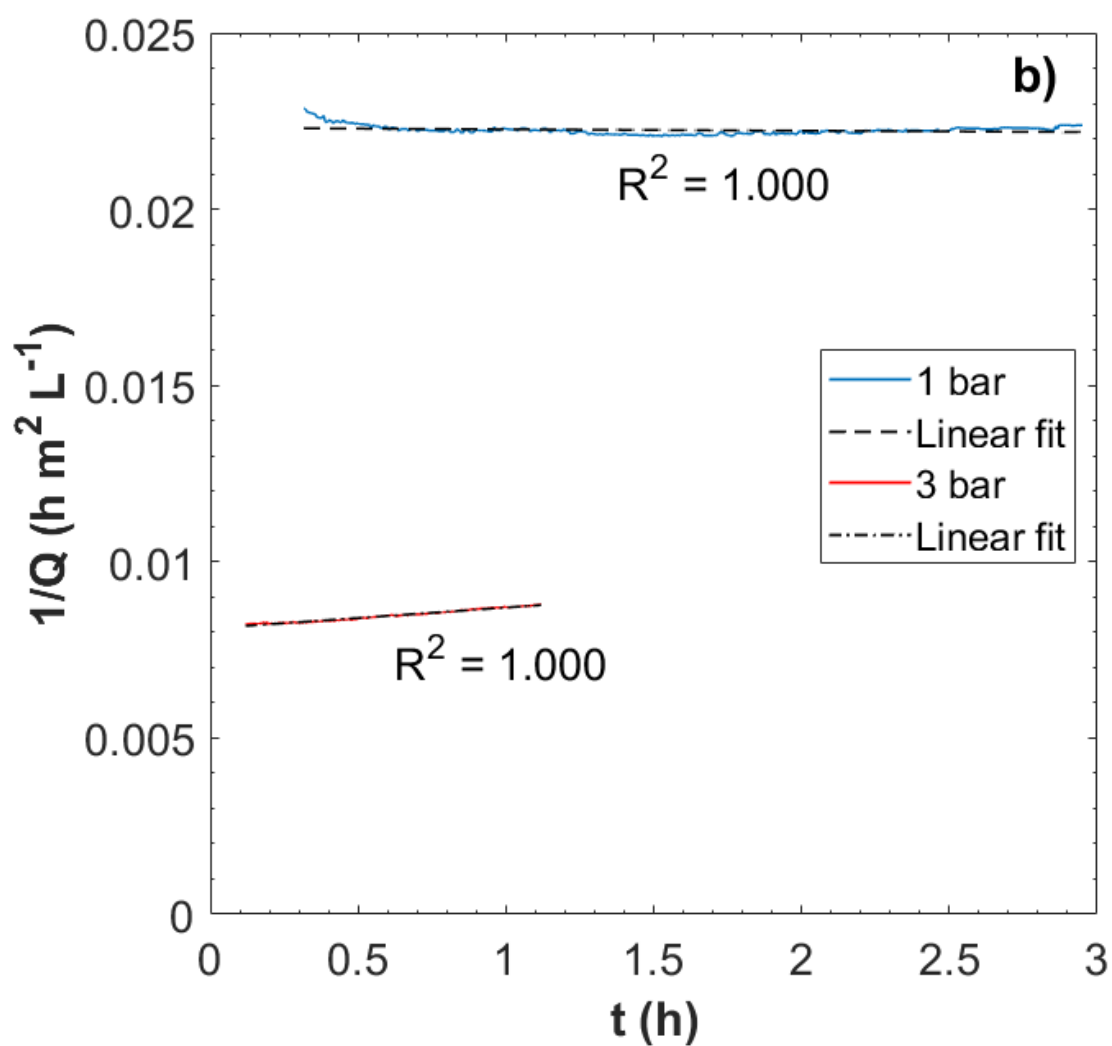

**Figure S4.** Typical curves from  $V_{max}$  analysis for filtration of 30 nm latex particles in SWW through nanocellulose filter papers of thicknesses a) 9  $\mu\text{m}$  and b) 29  $\mu\text{m}$ . Solid curves indicate observed values of the inverted flux at overhead pressures 1 bar and 3 bar. The dashed curves are linear regression fits for analysis of  $V_{max}$  according to Equation S1.
